# Supplementary material for: Expression Plasticity of Peroxisomal Acyl-Coenzyme A Oxidase Genes Implies Their Involvement in Redox Regulation in Scallops Exposed to PST-Producing Alexandrium
Source: MDPI journal article supplement (doi:10.3390/md20080472), 2022-07-24
Supplement: s1 [file s1]

```

HSA.009223.2.ACOX1      : -----MNF-----D-----LRERDSASFNPELLTHILDGSPKTRRRREIENMILNPDF-QHEDLNFLTSSQRYEVAVRKSAIMVKKMREFGIA : 80
MUS.001258827.1.ACOX1  : -----MNF-----D-----LRERAAATFNPELLTHILDGSPENRRRREIENILNPDF-QHEDYNFLTSSQRYEVAVKKSATMVKKMREFGIA : 80
CF.64869.12.ACOX1      : -----MAAAKMSVNF-----D-----LAKERRKATFDVEQLTYIYLKERIKRRKRYLEDLAVNDPVIKECKPWAFCSREEQYEMGLKKHHIAKQIKLLGIT : 89
CF.11051.3.1.ACOX1     : -----MASAGTGTTAVNF-----D-----LAKERNRNSFHVENLTNFIYHSPERVRRRRYMQNIALQEPALKDMKPWAFRTREEENELSLCKQLHVLKQKELGIT : 91
CF.17615.31.ACOX1      : -----MAVAVNF-----D-----LERERQNAFDRETLTDFLYGSAQKQRRRYLKQNVFSDPEYQTMKSRVFCNREELYALHLQYINMRQIQEKLHIT : 85
CF.3421.13.ACOX1       : -----MAARGRVTVNA-----D-----LAKERASATFDVENLTDFIDGVAATKRRKRYLQDLAINDPELKNKSPWAVMTREEQYETALRKHYIMTKRLEEMGIT : 89
PY.8373.9.ACOX1        : -----MASAGTGKMTVNF-----D-----IAKERNRNSGFHVENLTNFIYHSPERVRRRRYMQNIALQDPVMKDSKPWAFRTREEEYELSLRKQLHVLQKQDLGIT : 91
PY.9399.9.ACOX1        : -----MAARGRVTVNA-----D-----LAKERASATFDVENLTDFIDGVAATKRRKRYLQDLAINDPELKNKSPWAVMTRKEQYETALRKHYIMAKRLEEMGIT : 89
PY.11121.10.ACOX1     : -----MNVNF-----D-----LAKERSKATFDVEQLTYVLYLKERTERKRYLENLAVNDPVIKECKPWAFCSREEQYEMALKKKHHIAKQIKLLGIT : 83
PY.5547.59.ACOX1       : -----MASAVNF-----D-----LERERKRAFDRETLTNFIYHSAQKQRRRYLKNAVFSDEYQAMKSRVFCNREELYALHLQYISFRRIQENLIT : 85
HSA.003491.1.ACOX2     : MGSPVHRVSLGDTWSRQMH-----D-----IESERMQSFDVERLTNILDGAQNTALRRKVESIIHSYEF-SCKDNYFMTQNERYKAAMRAFHRIIARRLGWL : 97
MUS.001155139.1.ACOX2 : MGNPGDRVSLGETWSREVH-----D-----IDSERHSPSFSVERLTNILDGIPNTELRRRVESLIQRDPVF-NLKHLYFMTDELYEDAVOKRFHLEKLAWSLGWS : 97
CF.52871.92.ACOX2      : ----MANEVMAGMGSTAINF-----D-----IARERLKASFDPVELTHVLDGKERTRARKLENLFLSDPLF-CLRDNIYLTSDLSYATMARSVKFLRLKQDKWS : 93
PY.716361.21.ACOX2     : ----MANEVMAGMESNAINF-----D-----IARERLKATFDPLELTHIFDGKERTRARKLENLFLSDPLF-CLRDNIYLTSDLSYATMARSVKFLRLKQDKWS : 93
HSA.015254.ACOX3       : -----MASTVEGGDTALF-----EFPGRGLDAYRARASFSWKELALFTE-EGMLRFRKTIFFSALENDPLF-ARSPGADLSLEKYRELNFLR----CKRIFEYDFL : 91
MUS.109646.2.ACOX3     : -----MGSLPEEKDSALWS-----DTPKGPLSAYRARASFSNGELLFWD-QQDVHFKKTIFFSTLENDFLF-ARSYGADLPLEKLRLEINFLR----CKRVFEYGF : 91
CF.57427.4.ACOX3       : MGDQRVKVQAAAGTQGGLEDVAVVPDSENMPKDLSDIELLKPPPGPLDVYRQASFDWKKMRLFMD-EEIIRYNMWTTLKEKDFLF-SQPMVTE-TVEKQRESTFYR----CKRLEFEYNFL : 117
PY.11077.9.ACOX3       : MGDRRVKVFQASSGTQEGLEDVAVVPGSENMPKDLSDIELLKPPPGPLDVYRQASFDWKKMRLFMD-EEIVRYKNMWTTLKEKDFLF-SQPMVTE-TVEKQRESTFYR----CKRLEFEYNFL : 117

```

### Fatty acyl CoA oxidase domain

```

HSA.009223.2.ACOX1      : DPDEIMWFKKLHLVNFVEPVG-----LNYSMFIPTLLNQTTAQKEKWLL-----SSKGLQIITYAQTEMGHGTHLRGLETTATYDPKTOEFILENSPTVTSIKWWPGGLGKTSNHAI : 188
MUS.001258827.1.ACOX1  : DPDEIMWFKKLHVMNFVEPVG-----LNYSMFIPTLLNQTTAQKEKWMH-----PSQELQIITYAQTEMGHGTHLRGLETTATYDPKTOEFILENSPTVTSIKWWPGGLGKTSNHAI : 188
CF.64869.12.ACOX1      : DDWDKFFYTEAAACHENSPIG-----LHTAMFLPLTRKQASEDQKKKFLS-----LAENMTIITYAQTELGHGCTFIRGLETTATYDPKTOEFILENSPTVTSIKWYWPNGNLGKTVNFCM : 197
CF.11051.3.1.ACOX1     : EEFDKYYYNEAVAPNENNVPG-----LHFGMFIPTIEKHTEEQKKKFVQ-----PAKDLKILCTYVQTELGHGCTFIRGLETTATFDPKTOEFILENSPTVTSIKWYWPNGNLGKTVNFCI : 199
CF.17615.31.ACOX1      : DNEELFIIRQALGPNEYAYLG-----VHGFMIPTIQKLTTEEQKKRWLP-----LAKNLEIITYAQTELGHGCTFIRGLETTATYDPKTOEFILENSPTVTSIKWYWPNGNLGKTVNFCI : 193
CF.3421.13.ACOX1       : NKDKLTYKEWVSLKHYPPTL-----VPHNRLLRKLESYVQCNAHKWIESFRSSSTQQVTLDECSRT-----FVRGLETTATYEPKTRFEVFLNSPTLTSIKWYWPNGNLGKTVNFCI : 197
PY.8373.9.ACOX1        : DEFDKYYNEATAPNENNVPG-----LHFGMFIPTIEKHTEEQKKKFVQ-----PAKDLKIICTYVQTELGHGCTFIRGLETTATFDPKTOEFILENSPTVTSIKWYWPNGNLGKTVNFCI : 199
PY.9399.9.ACOX1        : DERDKLNYKEAGANHESSPIG-----VHLSMFLPLTRKQASTEDQRRKFLP-----LAEKLAIIITYAQTELGHGCTFVRGLETTATYDAKTRFEVFLNSPTLTSIKWYWPNGNLGKTVNFCI : 197
PY.11121.10.ACOX1     : DEWDQYFYTEAAACHENSPIG-----LHSSMFLPLTRKQASEDQKKKFLP-----LAENMTIITYAQTELGHGCTFIRGLETTATYDPKTOEFILENSPTVTSIKWYWPNGNLGKTVNFCI : 191
PY.5547.59.ACOX1       : DQEECFIIRQAIGPNYYAIG-----VHGFMIPTIQKLTTEEQKKRWLP-----LAENLTIIITYAQTELGHGCTFIRGLETTATYDPKTOEFILENSPTVTSIKWYWPNGNLGKTVNFCI : 193
HSA.003491.1.ACOX2     : EDGRELGYA-YRALS GDVALN-----IH-RVEVRALRSLSEEQIAKWDP-----LCKNQIATITYAQTELGHGCTYQGLETTATYDAATOEFILENSPTVTSIKWYWPNGNLGKTVNFCI : 203
MUS.001155139.1.ACOX2 : EDGPERIYAD-RVLAGYNNLN-----LH-GIAMNAIRSLSEEQIAKWGO-----LGKNFOIITITYAQTELGHGCTYQGLETTATYDATOEFILENSPTVTSIKWYWPNGNLGKTVNFCI : 203
CF.52871.92.ACOX2      : EDDLHVA---LRIIRDQNCIT-----LHHSMFLPALERLASDEQKARWLP-----LARRYNMVITYAQTELGHGCTNLMELETTATYDKSTDEEVLSTPKLSSIKWWPGSLGKTSNHAI : 198
PY.716361.21.ACOX2     : EDDLILLA---LRLIRDQNCIS-----LHHSMFLPALERLASDQKARWLP-----LARRYHMYITYAQTELGHGCTNLMELETTATYDKATDEEVLSTPKLSSIKWWPGSLGKTSNHAI : 198
HSA.015254.ACOX3       : SVEDMFK-SPLKVPALIQCLGMDSSSLAAYKYLHLSLVGSAVYSSSE-RHLYTIO-----KIFRMEIFGCFALTELSHGCSNTKAMRTTAHYDPTOEFILENSPTVTSIKWYWPNGNLGKTVNFCI : 208
MUS.109646.2.ACOX3     : KVEELLK-NPLKILVLINCLGMDWSLANKCVLHMLVEGTTVFVSSE-KHFHYLE-----KIYSLIEFCFALTELSHGCSNTKAMRTTAHYDPTOEFILENSPTVTSIKWYWPNGNLGKTVNFCI : 208
CF.57427.4.ACOX3       : SEEALFD-NPLKHKILTCLGMYNWSLGAKYQLDVENTGGTVQATSA-RHADIVE-----KIKNFYEYFCFALTELSHGCSNTKAMRTTATYDLKTEEFILQTPDFEATKIWSGNYGKTMATHAV : 234
PY.11077.9.ACOX3       : SEDALFD-NPLKHKILTCLGMYNWSLGAKYQLDVENTGGTVQATSA-RHGDIIVE-----KIKSFEYFCFALTELSHGCSNTKAMRTTATYDPKTEEFVLQTPDFEATKIWSGNYGKTMATHAV : 234

```

```

HSA.009223.2.ACOX1      : VLAQLIT-KKCYGLHAFVPIREIGTHKPLPGITVGDIGPKFGYDEIDNGYIKMDNHRIPRENMLMKYAAQKPDGTYVKPLS--NK---LTYGTVFVRSFLV-GEAARA-SKACTIAIRYSA : 305
MUS.001258827.1.ACOX1  : VLAQLIT-RGEYGLHAFVPIREIGTHKPLPGITVGDIGPKFGYEEMDNGYIKMDNHRIPRENMLMKYAAQKPDGTYVKPLS--NK---LTYGTVFVRSFLV-GSAAQS-SKACTIAIRYSA : 305
CF.64869.12.ACOX1      : IMAQLYT-KKCYGVHAFVPIREIGTHKPLPGITVGDIGPKFGYGTNDNGYIRLNNVRIPRDHMLMRYSKVLEDGTYVKPPN--SR---LSYGSMTLVRAAIV-GDSSRG-LAQACTIAIRYSA : 314
CF.11051.3.1.ACOX1     : IMAQLYS-QCKCQGPMPHFLPLRDLNTHQSLPGVELGDIGPKFGYAAANDNGYIRLNNLRIPRDHMLMRYSKVLEDGTYVKPPN--SK---LSYGSVMIRASIV-GFSSRA-LAQACVIAVRYSA : 316
CF.17615.31.ACOX1      : IMAVLNT-QCKNHGLSFVPIRDLKTHESLPGVEVGDIGPKFGFNENDNGYIRLNNVRIPRDHMLMRYAKVLEDGTYVKPPN--AQ---SNLGPVVVRVLLSGEILPILOKACVIAVRYSA : 312
CF.3421.13.ACOX1       : VMAQLYT-NCKCYGMHTFLPLRDLRTHRSPLGIELCDIGPKFGYSSNDNGYIRLNNVRIPRENMLMRYAAQVLEDGTYVKPSN-AK---ISYGTMTLIRVGIV-TNVSRC-LAQACVIAVRYSA : 314
PY.8373.9.ACOX1        : LMAQLYS-QCKCQGPMPHFLPLRDLNTHQSLPGVELGDIGPKFGFNANDNGYIRLNNVRIPRENMLMRYSKVLEDGTYVKPPN--SK---LSYGSVMIRASIV-GAVSRA-LAQACVIAVRYSA : 316
PY.9399.9.ACOX1        : VMAQLYT-NCKCYGMHTFLPLRDLNTHQSLPGIELGDIGPKFGYGSNDNGYIRLNNVRIPRENMLMRYAAQVLEDGTYVKPPN-AK---ISYGTMTLIRVGIV-TNVSRC-LAQACVIAVRYSA : 314
PY.11121.10.ACOX1     : IMAQLYT-KKCKGIGITFLPLRDLQTHQSLPGIELCDIGPKFGYGTNDNGYIRLNNVRIPRDYMLMRYSKVLEDGTYVKPPN--SR---LSYGSMTLIRAAIV-GDSSRG-LAQACTIAIRYSA : 308
PY.5547.59.ACOX1       : IMAVLNT-QCKNHGLSFVPIRDLKTHKSLPGVEVGDIGPKFGFNENDNGYIRLNNVRIPRDHMLMRYAKVAEDGAFTVSTNEGSR---LTYGTVLFRVAMIV-SGTSTV-LGMACTVIAVRYSA : 312
HSA.003491.1.ACOX2     : VQAQLIC-SGARRGMAHAFVPIRSLQDHTPLPGIIGDIGPKMDFDQTLNNGYIRLNNVRIPRDHMLMRYAKVAEDGAFTVSTNEGSR---LTYGTVLFRVAMIV-SGTSTV-LGMACTVIAVRYSA : 312
MUS.001155139.1.ACOX2 : VLAHLIC-LGARRGMAHAFVPIRSLQDHTPLPGITVGDIGPKMDFFNENDNGYIRLNNVRIPRENMLMRYAAQVLEDGTYVKPLS--AQ---SNLGPVVVRVLLSGEILPILOKACVIAVRYSA : 321
CF.52871.92.ACOX2      : VLAQLVVDNKKC-GMFFFMVQIRSLMDHTPMPGKIKGVIGQKMGNYNDNGYIRLNNVRIPRENMLMKNAQVTRTEKFLTSGP--NK---ANATMIYVRVMTL-SWSFGAICAAATAIRYSS : 315
PY.716361.21.ACOX2     : VLAQLVVDSSKKC-GMFFFMVQIRSLMDHTPMPGKIKGVIGQKMGNYNDNGYIRLNNVRIPRENMLMKNAQVTRTEKFLTSGP--NK---ANATMIYVRVMTL-SWSFGAICAAATAIRYSS : 315
HSA.015254.ACOX3       : VFAKLCVPGDQCCHGLSFLVQIRDPKLLPMPGVMVGDIGKKLQNGLNGFAMFHKVVRPQSLNLFMGDVTPEGTYYSPFKDVQRQFGASLGSLSGGSIVSII-SMVSVN-KLVAIAIRYSA : 331
MUS.109646.2.ACOX3     : VFAQLYMPDQCCHGLSFLVQIRDPKLLPMPGVMVGDIGKKLQNGLNGFAMFHKVVRPQSLNLFMGDVTPEGTYYSPFKDVQRQFGASLGSLSGGSIVSII-SMVSVN-KLVAIAIRYSA : 331
CF.57427.4.ACOX3       : TYAQLYTPDNCCHGLSFLVQIRDPKLLPMPGVMVGDIGKKLQNGLNGFAMFNNYHIRETLNRTGDKADGIYVTPYKDPKSRFGASLGSLSGGSIVSII-SMVSVN-KLVAIAIRYSA : 357
PY.11077.9.ACOX3       : VYAQLYTPDNCCHGLSFLVQIRDPKLLPMPGVMVGDIGKKLQNGLNGFAMFNGYHIRETLNRTGDKADGIYVTPYKDPKSRFGASLGSLSGGSIVSII-SMVSVN-KLVAIAIRYSA : 357

```

[illegible]

|                       |                                       |                      |     |                                |                                 |                                |              |       |
|-----------------------|---------------------------------------|----------------------|-----|--------------------------------|---------------------------------|--------------------------------|--------------|-------|
| HSA.009223.2.ACOX1    | : TMMFQTARYFLMKSYD-QVHS               | -----KLVCGMVS---     | YLN | NDLPSQRIQPQQVAVWPTMVDINSPELSTE | AYKLRAARLVEIAAKNLQKE-VIHRKSKEV  | WNLTSDVLVRA-SBAHCHYVV          | : 536        |       |
| MUS.001258827.1.ACOX1 | : TMMFQTARYFLMKIYD-QVQS               | -----KLVCGMVS---     | YLN | NDLPSQRIQPQQVAVWPTLIDNSLDLSTE  | AYKLRAARLVEIAAKNLQQAQ-VSHRKSKEV | WNLTSDVLVRA-SBAHCHYVV          | : 536        |       |
| CF.64869.12.ACOX1     | : TMMFQTARYFLMKCFKFS-KVEN             | -----EKLPGFVS---     | YLS | T-----DLSVKSCKMSDVLSDCLVK      | FEHRAARLVQVAARNIKRRLVVEE        | QSQQEVWNNNTAQQLVWA-SBAHCHYVV   | : 495        |       |
| CF.11051.3.1.ACOX1    | : TMMFQTARYLLKCAL-MVQK                | -----QRLPDLVA---     | YLS | T-----DLSAKSCMTSDVALGCLVK      | AYQHRAARLTKAATAAVQRY-TSE        | KNPTDFNMASTQLSWA-ARAHCHQVV     | : 538        |       |
| CF.17165.31.ACOX1     | : TMMFQTARYFLMKCYN-QLKMK              | -----KSLPSSFA---     | YIT | D-----KLSGKSDLDNKLNFNSI        | IEAYEHRAARLIKAAALNITFW-VKA      | QKVPWDSNTKSSIHMVWA-AKASHCHLFV  | : 534        |       |
| CF.3421.13.ACOX1      | : TPLYQTARYLLKCFET-KVQK               | -----EKLPGFVS---     | YMG | T-----DLTIKSTIKSDVALESIVL      | AYEHRAARMVRAAAMNIQGL-VRE        | FTQPEWNNKSTAQQLVWA-TMAHCHYVV   | : 536        |       |
| PY.8373.9.ACOX1       | : SMMFQTARYLFECAM-MVQK                | -----QRLPDLVS---     | YLS | M-----DLSAKSCMTSDVALGCLVK      | AYQHRAARLTNAATAVVQRH-INE        | GKPTDFNMASTQTLTWA-ARAHCHQVV    | : 538        |       |
| PY.9399.9.ACOX1       | : TPLYQTARYLLKCFET-KVQK               | -----EKLPGFVS---     | YMG | T-----DLSIKSTIKSDVLSLLAY       | EHRAARMVKAAMNIQGL-VQEF          | FTQPEWNNKSTAQQLVWA-TMAHCHYVV   | : 536        |       |
| PY.11121.10.ACOX1     | : TMMFQTARYLLMKCFA-KVEN               | -----EKLPGFVS---     | YNT | T-----DLSAKSCMTSDVALDCLVK      | AYEHRAARLVQVAARNIKRRLVVEE       | QSQQEVWNNNTAQQLVWA-SBAHCHYVV   | : 531        |       |
| PY.5547.59.ACOX1      | : TMMFQTARYLLVKCYN-QMKMK              | -----KSLPSSFA---     | YIT | D-----NLSGKSDLDNKLNFDSI        | IEAYEHRAARLIKAAALNITFW-MKA      | KNKVPWDSNTKSSIQMVWA-AKASHCHLFV | : 534        |       |
| HSA.003491.1.ACOX2    | : TPLYQVARYFLVKSYL-QTQMSPGSTPQRLSPSVA | -----YITAT---PD---   | LAR | CPAQRAADFCEPLYTTAWHVAVAL       | IKDSDVQHLOTLT-QTSDAQDHEWNNQT    | TVHILQA-AKVHGYEYTV             | : 552        |       |
| MUS.001155139.1.ACOX2 | : TPLYQVARYFLMKSYL-QADTSPGSIPOKLPQSYM | -----YITAT---PR---   | PAR | CPAQRAADFCEPVYTTAWHVAVAL       | IKDSDVQHLOTLT-MRSDVQDHEWNNQT    | TVHILQA-AKVHGYEYTV             | : 552        |       |
| CF.52871.92.ACOX2     | : TPLYQVARYLLKQIA-KALT                | -----HQTGTGTE---     | YLN | M---NEA---SYICPLQKVPDCRNTE     | FLCEVYKKRAYSMVLKVAQALQD-MEAK    | KEQAVYMNNNLQPLVRM-ATAHCHYLLAM  | : 541        |       |
| PY.716361.21.ACOX2    | : TPLYQVARYLLKQIA-KALT                | -----HQTGTGTE---     | YLN | M---NEA---SYICPLQKVPDCRNTE     | FLCEVYKKRAYSMVLKVAQALQD-MEAK    | KEQAVYMNNNLQPLVRM-ATAHCHYLLAM  | : 541        |       |
| HSA.015254.ACOX3      | : NILLQOTSNYLLGLLGHVQHD               | -----AQFSPKSVDF---   | DAY | PGIL---DYQFVESSVADLSDAVALA     | YKWLVCYLRETYKLNQE-KRS           | SDFEARNKQVSHGRPLALFYELTV       | : 568        |       |
| MUS.109646.2.ACOX3    | : NILLQOTSNYLLSLEPPLQD                | -----AHFTSPLKTVDF--- | EAY | PGIL---GQKFLGSSKADWMDS         | AAPLAAAYRWLVCYLQBSHRRY          | CQE-KKSRGSDFEARNNSQVYGC        | RPLALAFMELTV | : 568 |
| CF.57427.4.ACOX3      | : NILLQOTSNYLLGLLESNIK                | -----EINTPLKSVNF---  | S   | DLGGL---KTTFEARTVEDCFNPEV      | SLRAYKWLGVRLVDSAEERLKEQ-QQA     | KDAFSARNDSQAYYCRSLALAYEHTVL    | : 594        |       |
| PY.11077.9.ACOX3      | : NILLQOTSNYLLGLLESNIR                | -----EINTPLKSVNF---  | S   | DLGGL---KTTFEARTVEDCFNPEV      | SLRAYKWLGVRLVDSAEERLKEQ-QQA     | KDAFSARNDSQAYYCRSLALAYEHTVL    | : 594        |       |

|                       |   |                                                                                                                            |       |
|-----------------------|---|----------------------------------------------------------------------------------------------------------------------------|-------|
| HSA.009223.2.ACOX1    | : | KLFSEKLLK---IQ-DKAIQAVLRSLCLFYSLYGISQNAQDLOGSIMTEPI-TQVNRQVKELLTLISPAVALVDADFDFDVTLSVSLGRDGNVYENLFWEAKKSS--LNKAEVHESY-KH   | : 652 |
| MUS.001258827.1.ACOX1 | : | KVEADKLPK---IQ-DRAVQAVLRNLCLFYSLYGISQKGGDELEGNITGAMQ-SQVNSRIELLETLVTPNAVALVDADFDFDVTLSVSLGRDGNVYENLFWEAKKSS--LNKTEVHESYKYH | : 653 |
| CF.64869.12.ACOX1     | : | KVEVMVTE---SNFDDQVNLVTSCKLYGVHGMENLCEIQDGYLSTSV-EDVTKGLMYLMAEIPDAVALVDADFDPDVLSSCLGRDGNVYALYKYYKSS--LNKTDVLTDSFYKY         | : 613 |
| CF.11051.3.1.ACOX1    | : | KVEVMTMTE---AKIDDRTKAALTTLCKMYAVNGIMENLCEIQDQFFNADSV-DILTGKMMTLTLADVPDAVALVDADFDFHCKVLDSCLCRDGNVYALYKYYKSS--LNEKDVLDSSFHY  | : 656 |
| CF.17165.31.ACOX1     | : | KTEFINVTS---ANLDPKVRSTALTTLCKRYAVNGMIENMQISQDGFLEDTI-NMLNRLTDLLEEVTNATFTVDAFEYHDNELHSCICGRDGOVYKALYNYKSS--LNDTDPVHSSFHKY   | : 652 |
| CF.3421.13.ACOX1      | : | KTETATIFR---SLDDTKTKMTAALCKLYGVHGMVENLCEIQDGFMNASV-DVTRTKMLYLAETIPDAVALVDADFDPDVLSSCLGRDGOVYKALYNYKSS--LNKDKVLDSSFY        | : 654 |
| PY.8373.9.ACOX1       | : | KVEVTTVTE---ANIDDRTKAALTTLCKMYAVNGIMENLCEIQDQFFNTDVS-DILTRKMMTLTLADVPDAVALVDADFDFHCKVLDSCLCRDGNVYALYKYYKSS--LNEKDVLDSSFHY  | : 656 |
| PY.9399.9.ACOX1       | : | KTETATIFG---SNLDDQTKVMTAALCKLYGVHGMVENLCEIQDGFMNASV-DVTRTKMLYLAETIPDAVALVDADFDPDVLSSCLGRDGOVYKALYNYKSS--LNKDKVLDSSFY       | : 654 |
| PY.11121.10.ACOX1     | : | KAEVAMVTE---SNLDDQVNLVTSCKLYGVHGMHLECEIQDGYLSTSV-EAVTGKMLMALKEIHNAVALVDADFDPDVLSSCLGRDGNVYALYKYYKSS--LNKQDVLDSEYKY         | : 649 |
| PY.5547.59.ACOX1      | : | KTEINLVT---ANLDPKVRTALTTLCKRYAVNGMIENMQISQDGFLENETI-NMLNRLSALLEEVANAVAFVDAFEYHDNELHSCICGRDGOVYKALYNYKSS--LNDTDPVHSSFHKY    | : 652 |
| HSA.003491.1.ACOX2    | : | KGEAEALK---LENEPAIQVLRKRDYHAHGLITNSGDLHDAFISGAV-DMARTAYLDLRLRLKDAILTDAFDFDQCNLSALCVGDNVERLRFWEAKKSS--TNQE-NPAYEY           | : 669 |
| MUS.001155139.1.ACOX2 | : | RNEKAEVKE---LDNEPEIQVLRNLQDYLALGLITNSGDLHDGFLSGAV-DMARTAYLDLRLPLIKDAILTDAFDFSDHCLNSALCVGCHVYQRLFEWAKKSS--ANTQE-NPAYKY      | : 669 |
| CF.52871.92.ACOX2     | : | AGYVEGLAS---VQLSPPAKKITNKKCCFVGHYIVTSLSGDLEAEAIGLEL-QWLQDLEIQLLAEIIPDAVTLVDALDFHDETSSAIGCDGRAYERLRYEALKKE--MNQTEVPDPAKEY   | : 659 |
| PY.716361.21.ACOX2    | : | RSYIEGLAS---LQVSPPAKKLIDKCCFVGHYIVTSLSGDLEAEAIGLEL-LWLQELEQLLAEIIPDAVTLVDALDFHDETSSAIGCDGRAYERLRYEALKKE--MNQTEVPDPAKEY     | : 659 |
| HSA.015254.ACOX3      | : | QREHEHVQ---PSVPPSLRAVLRGRSALYALWSLSRHAALYRGGYFSGEAGEVLESVALCSQKLDAAVLDVIAPDFVLDSPICRADGELYKNLNGAVLQESKVERASWPEFSVN         | : 689 |
| MUS.109646.2.ACOX3    | : | QREHEHIHS---SGLSPSLRTVLGRSTLYGLWCLSQHMALLYRGGYISGETGRAMEDAILTLCQLKDDAVALVDVIAPDFVLSNPICAKDGLYKNLNGAVLQNGVLERAAWPEFSAN      | : 689 |
| CF.57427.4.ACOX3      | : | DREHQLMTEGRNGDTPPELKPVLNKMCAFLGRWLEKHLSTLYCGGYIKGSNPPKIQEAILKLCYALKEAVSLVDAIAPDVFVNSPICLSDGQIYKNLYGAMIQGNALERPAAWKDFVDN    | : 718 |
| PY.11077.9.ACOX3      | : | DREHQLMEGRNGDTPPELKPVLNKMCAFLGRWLEKHLSTLYCGGYIKGSNPPKIQEAILKLCYALKEAVSLVDAIAPDVFVNSPICLSDGQIYKNLYGAMIQGNALERPAAWKDFVDN     | : 718 |

peroxisomal targeting signal

|                       |                           |       |
|-----------------------|---------------------------|-------|
| HSA.009223.2.ACOX1    | : LKSLQ-----SKL           | : 660 |
| MUS.001258827.1.ACOX1 | : LKFLQ-----SKL           | : 661 |
| CF.64869.12.ACOX1     | : LKEMRGDTSTYPLRA--SKL    | : 631 |
| CF.11051.3.1.ACOX1    | : IKEMREGQATSSLP---ARL    | : 673 |
| CF.17615.31.ACOX1     | : LAFLKKKE-----SKL        | : 662 |
| CF.3421.13.ACOX1      | : LRFLQGNMTTSTF---AKL     | : 670 |
| PY.8373.9.ACOX1       | : IKELREGQATSSLP---SRL    | : 673 |
| PY.9399.9.ACOX1       | : LRFLQGNTGTSSL---AKL     | : 670 |
| PY.11121.10.ACOX1     | : LKEMRGDTSNSAHLPLRA--SKL | : 669 |
| PY.5547.59.ACOX1      | : LAFLKKKE-----SKL        | : 662 |
| HSA.003491.1.ACOX2    | : IRELLQSWR-----SKL       | : 681 |
| MUS.001155139.1.ACOX2 | : IRELMQSWK-----PKL       | : 681 |
| CF.52871.92.ACOX2     | : LKHLIMEGAP-----SKL      | : 672 |
| PY.716361.21.ACOX2    | : LKHLIMEGAQ-----SKL      | : 672 |
| HSA.015254.ACOX3      | : -KEVIGSLK-----SKL       | : 700 |
| MUS.109646.2.ACOX3    | : -KSVADRLK-----SQL       | : 700 |
| CF.57427.4.ACOX3      | : -KEVVGSK-----SKL        | : 728 |
| PY.11077.9.ACOX3      | : -KEVVGSK-----SKL        | : 728 |
